## Retraction

**Retraction: Downregulation of X-linked inhibitor of apoptosis protein by '7-Benzylidenenaltrexone maleate' sensitizes pancreatic cancer cells to TRAIL-induced apoptosis****So Young Kim<sup>1</sup>, Sojung Park<sup>1</sup>, SeonA Yoo<sup>1</sup>, Jin Kyung Rho<sup>1,2</sup>, Eun Sung Jun<sup>3</sup>, Suhwan Chang<sup>3</sup>, Kyung Kon Kim<sup>1,2</sup>, Song Cheol Kim<sup>4</sup> and Inki Kim<sup>1,2</sup>**<sup>1</sup>ASAN Institute for Life Sciences, ASAN Medical Center, Seoul, 05505, South Korea<sup>2</sup>Department of Convergence Medicine, University of Ulsan College of Medicine, Seoul, 05505, South Korea<sup>3</sup>Department of Biomedical Sciences, University of Ulsan College of Medicine, Seoul, 05505, South Korea<sup>4</sup>Division of HBP Surgery, Department of Surgery, University of Ulsan College of Medicine, Asan Medical Center, Seoul, 05505, South Korea**Published:** December 31, 2025**Copyright:** © 2025 Kim et al. This is an open access article distributed under the terms of the [Creative Commons Attribution License](#) (CC BY 4.0), which permits unrestricted use, distribution, and reproduction in any medium, provided the original author and source are credited.

**This article has been retracted:** The journal initiated an investigation into this paper after the authors requested a correction for six Western blot images (Figures 2A, 3A, 5A–5C, and Supplementary Figure 3B) without providing a detailed explanation of the errors. Our investigation found two instances of image duplication:

1. The “ $\alpha$ -Tubulin” blot in Figure 2A was rescaled and reused as the “ $\alpha$ -Tubulin” blot in Figure 5C.
2. The “Survivin” blot in Figure 3A is a reuse of the “p-CDK9 (T186)” blot previously published in Figure 5C of an earlier article from the same research group [1].

The authors were contacted for comment but did not respond. Due to the number and nature of these issues, the editorial decision was made to retract this paper.

Original article: Oncotarget. 2017; 8:61057–61071. <https://doi.org/10.18632/oncotarget.17841>

**REFERENCES**

1. Kim SY, Park SE, Shim SM, Park S, Kim KK, Jeong SY, Choi EK, Hwang JJ, Jin DH, Chung CD, Kim I. Bay 61-3606 Sensitizes TRAIL-Induced Apoptosis by Downregulating Mcl-1 in Breast Cancer Cells. PLoS One. 2015; 10:e0146073. <https://doi.org/10.1371/journal.pone.0146073>. [PubMed]
